# Supplementary material
Source: publisher site journal article supplement (https://www.spandidos-publications.com/2724/downloadSupplementary)
Supplement: Supplementary file 1 [file downloadSupplementary]

Figure S1. Expression levels of LOC284454 in human non-tumor liver samples and in non-cancerous tissues from patients with hepatocellular carcinoma.

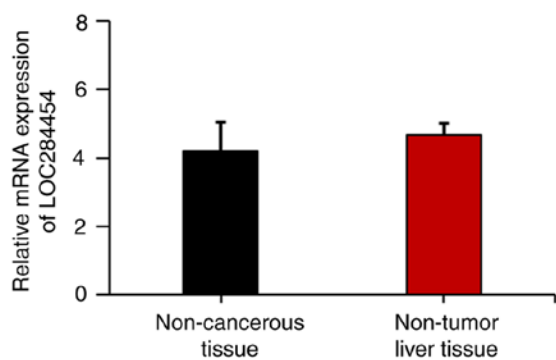

Figure S2. Fluorescence *in situ* hybridization assays revealed the location and expression levels of LOC284454 in MHCC-97L and Hep3B cells (magnification, x200). sh, short hairpin; Ctrl, control.

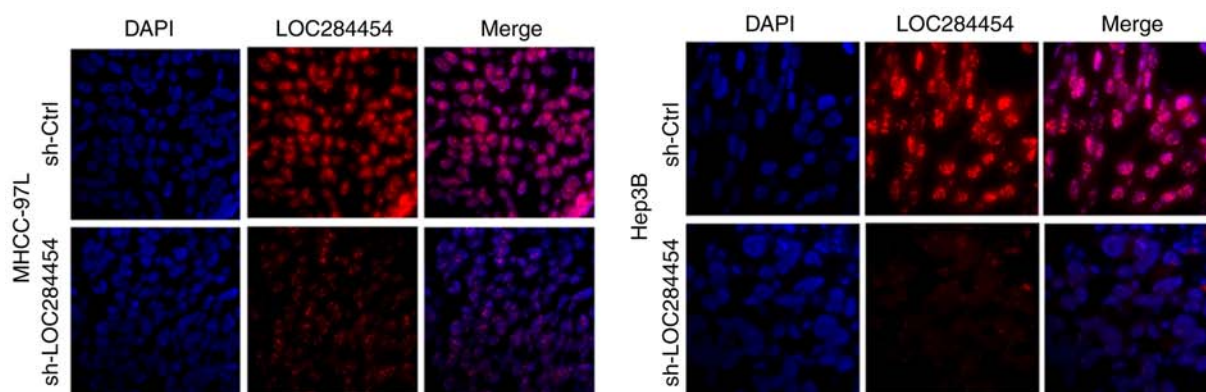

Figure S3. LOC284454 binds with EZH2. (A) RIP assay revealed the association between endogenous LOC284454 and EZH2 in liver cancer cells. (B) Pull-down assays. (C) Luciferase reporter assays revealed the levels of LOC284454 or EZH2 in 293T cells. \*\*P<0.01 vs. IgG, Bio-NC or ov-NC. RIP, RNA immunoprecipitation; Bio, biotinylated; NC, negative control; EZH2, enhancer of zeste homolog 2; WT, wild-type; MUT, mutant; ov, overexpression.

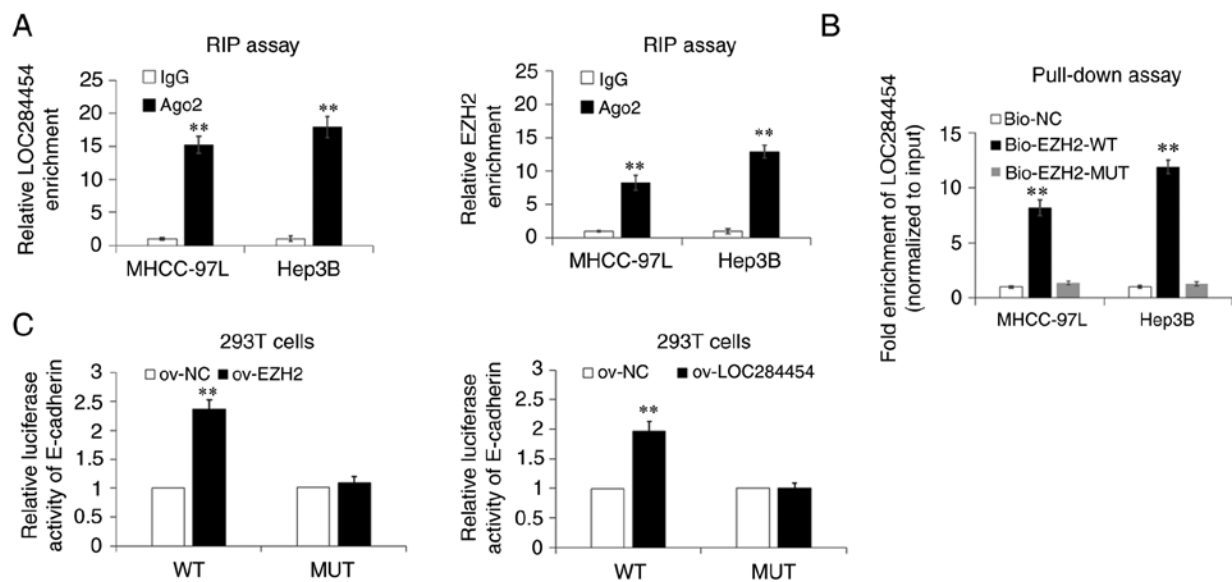

Figure S4. EZH2 is essential for the inhibitory effect of LOC284454 on E-cadherin. (A) LOC284454, EZH2 and E-cadherin expression was measured by reverse transcription-quantitative PCR in MHCC-97L and Hep3B cells. (B) EZH2 and E-cadherin expression was measured by western blotting. \*\*P<0.01. Ctrl, control; ov, overexpression; sh, short hairpin; EZH2, enhancer of zeste homolog 2.

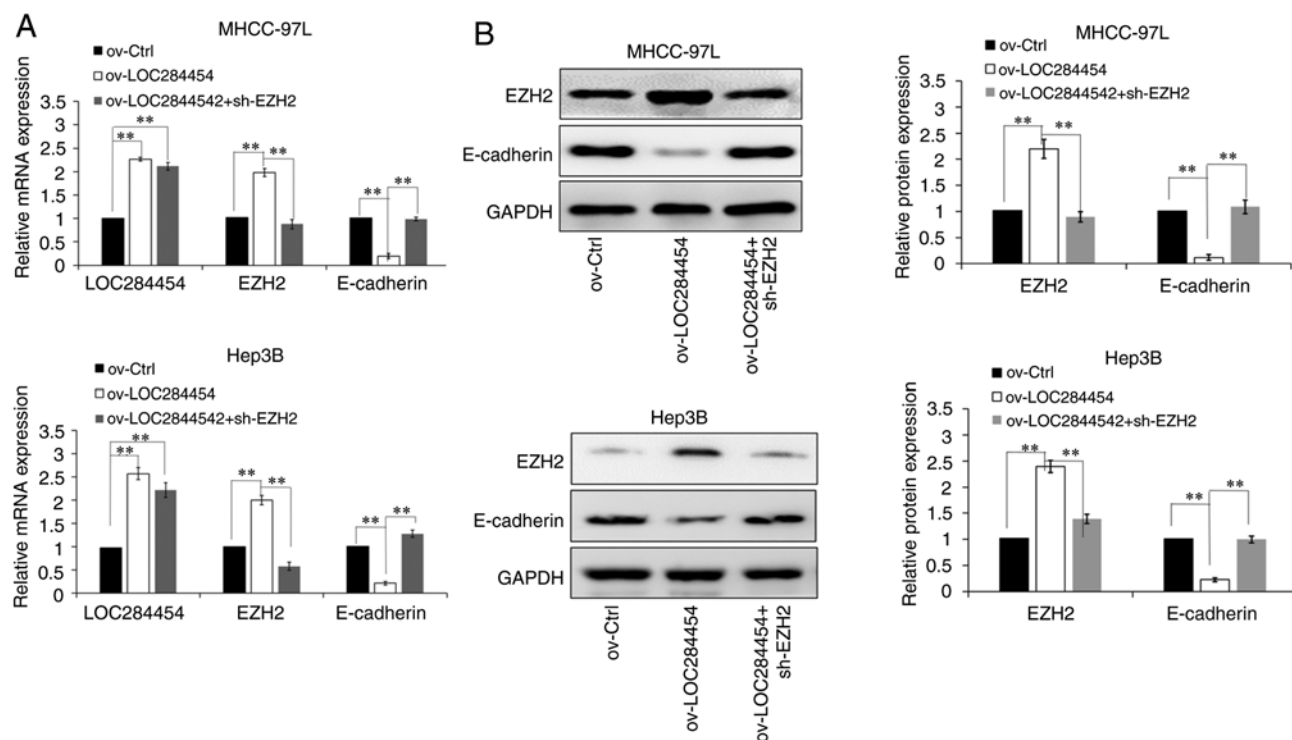

Figure S5. E-cadherin expression is significantly significantly downregulated in MHCC-97L and Hep3B cells transfected with sh-E-cadherin. E-cadherin expression was assessed by reverse transcription-quantitative PCR in (A) MHCC-97L and (B) Hep3B cells. \*\* $P < 0.01$  vs. Ctrl. sh, short hairpin; Ctrl, control.

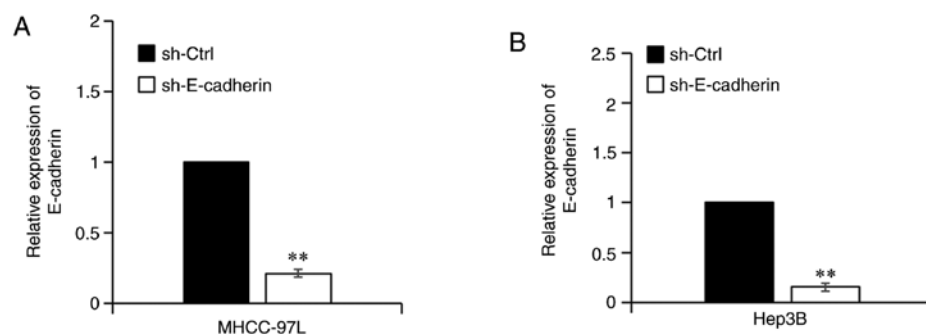

Table SI. Clinical characteristics of the 15 patients from whom the non-tumor liver samples were obtained.

| Variable                       | Total no. of patients |
|--------------------------------|-----------------------|
| Age, years                     |                       |
| <45                            | 11                    |
| ≥45                            | 4                     |
| Sex                            |                       |
| Female                         | 6                     |
| Male                           | 9                     |
| Hepatitis B surface antigen    |                       |
| Positive                       | 2                     |
| Negative                       | 13                    |
| Reasons for surgical resection |                       |
| Hepatolithiasis                | 10                    |
| Liver trauma                   | 5                     |

Table SII. Primer sequences used for reverse transcription-quantitative PCR.

| Gene       | Forward                      | Reverse                     |
|------------|------------------------------|-----------------------------|
| LOC284454  | 5'-TGGCTAGCCTAGTCACAGTTG-3'  | 5'-TTCCCCTAATTGGGAGGTTTC-3' |
| E-cadherin | 5'-AGTGCGCTGGACTAGTCAGTAA-3' | 5'-ATCACCCCTCTAATGCCATCC-3' |
| EZH2       | 5'-TCACGATCGGTCATCGGATTC-3'  | 5'-TTGCACCCTTTCATGATTGC-3'  |
| N-cadherin | 5'-CCACCATATGACTCCCTCTT-3'   | 5'-AGAAAATAATTCCAATCTA-3'   |
| Vimentin   | 5'-GACAATGCGTCTCTGGCACGT-3'  | 5'-TCCTCCGCCTCCTGCAGGTT-3'  |
| GAPDH      | 5'-TGAAGGTCGGAGTCAACGG-3'    | 5'-CCTGGAAGATGGTGATGCGG-3'  |

EZH2, enhancer of zeste homolog 2.
